# Supplementary material for: Phytochemical Analysis, Antioxidant and Enzyme-Inhibitory Activities, and Multivariate Analysis of Insect Gall Extracts of Picea koraiensis Nakai
Source: MDPI journal article supplement (doi:10.3390/molecules28166021), 2023-08-11
Supplement: s1 [file s1]

## SUPPLEMENTARY MATERIAL

# Phytochemical analysis, antioxidant and enzyme-inhibitory activities and multivariate analysis of insect gall extracts of *Picea koraiensis* Nakai

Yanqiu Wang <sup>1,2,†</sup>, Hui Sun <sup>3,†</sup>, Xu He <sup>1,3</sup>, Meihua Chen <sup>1,3</sup>, Hao Zang <sup>1,3</sup>, Xuekun Liu <sup>1,3,\*</sup> and Huri Piao <sup>1,\*</sup>

<sup>1</sup> College of Pharmacy, Yanbian University, Yanji 133000, China

<sup>2</sup> Tonghua Health School, Tonghua 134000, China

<sup>3</sup> Green Medicinal Chemistry Laboratory, School of Pharmacy and Medicine, Tonghua Normal University, Tonghua 134002, China

\* Correspondence: liuxuekunth@126.com (X.L.); piaohr@ybu.edu.cn (H.P.);

Tel.: +86-435-320-2678 (X.L.); +86-433-243-5003 (H.P.)

† These authors contributed equally to this work.

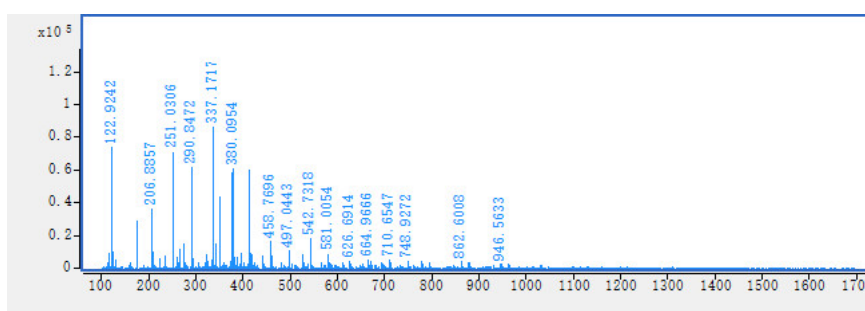

Figure S1 MS spectrum of peak 1

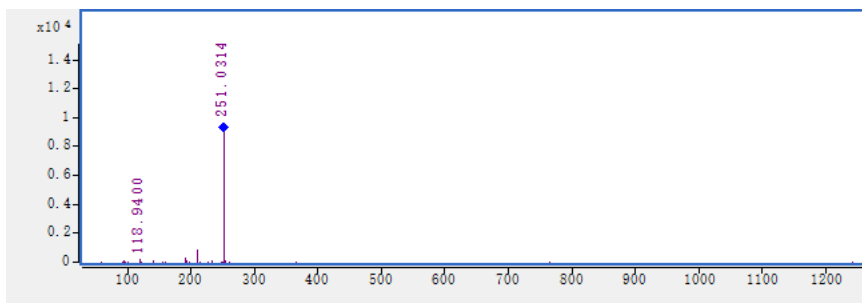

Figure S2 MS/MS spectrum of peak 1

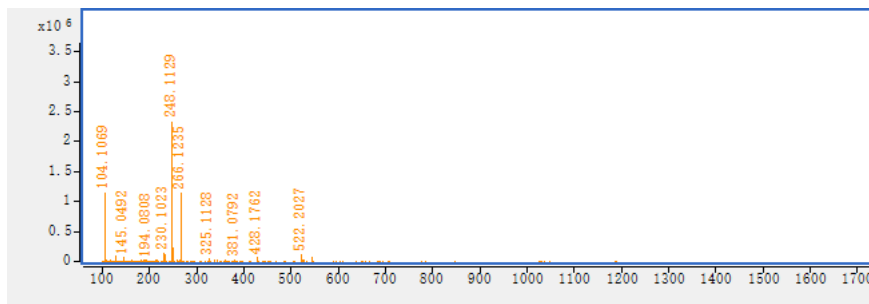

Figure S3 MS spectrum of peak 2

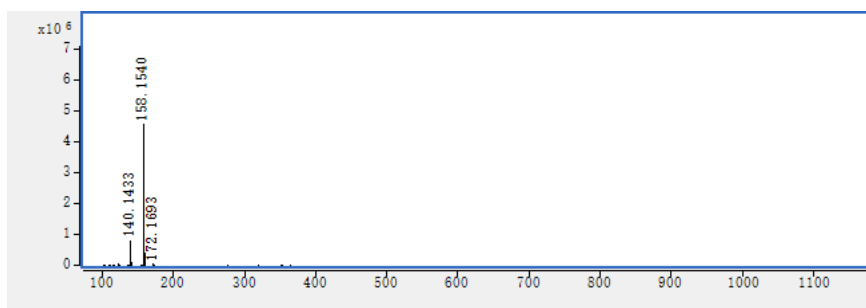

**Figure S4** MS spectrum of peak 3

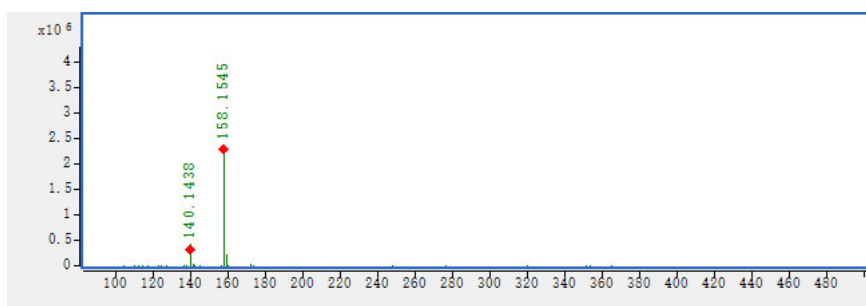

**Figure S5** MS/MS spectrum of peak 3

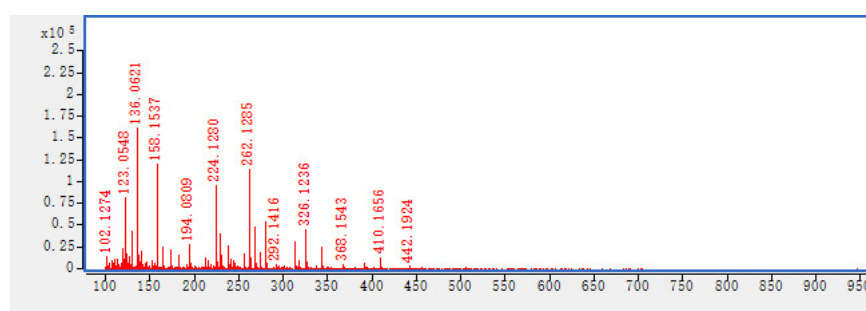

**Figure S6** MS spectrum of peak 4

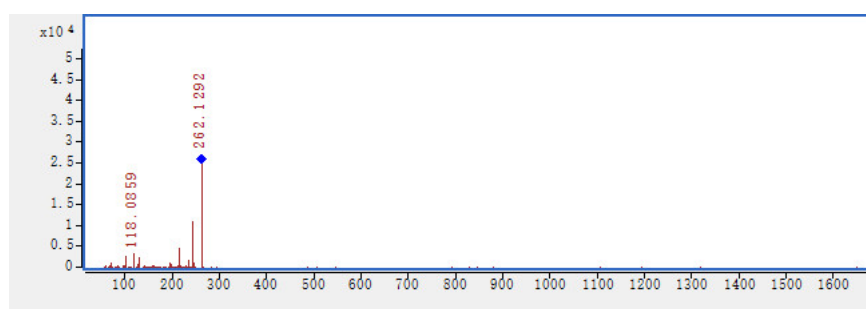

**Figure S7** MS/MS spectrum of peak 4

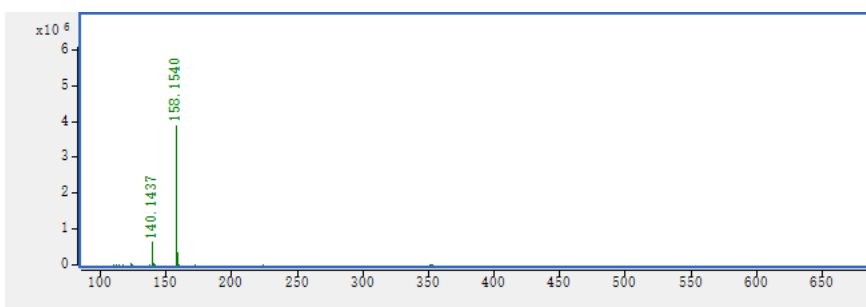

**Figure S8** MS spectrum of peak 5

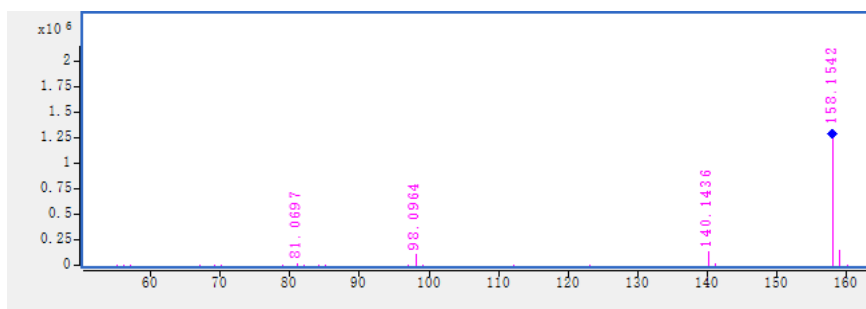

**Figure S9** MS/MS spectrum of peak 5

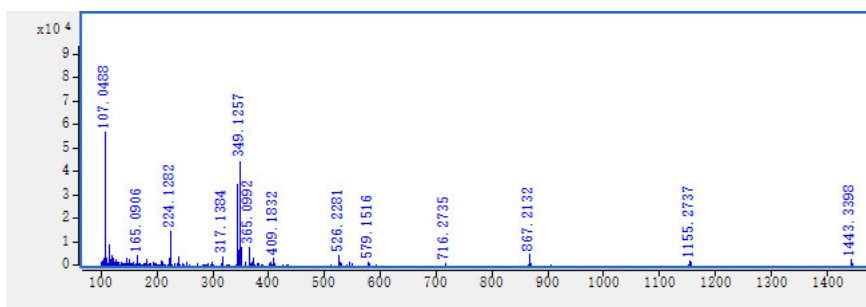

**Figure S10** MS spectrum of peak 6

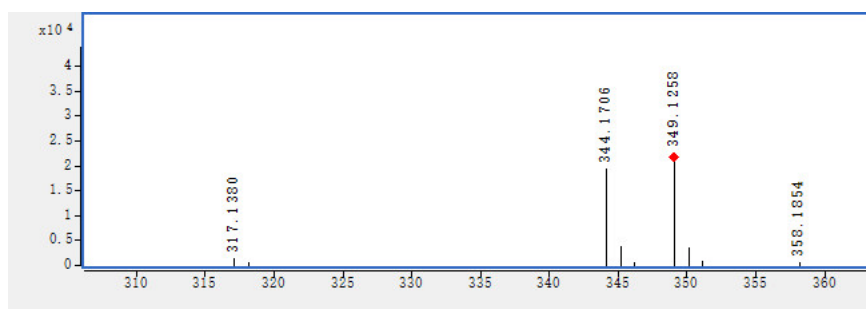

**Figure S11** MS/MS spectrum of peak 6

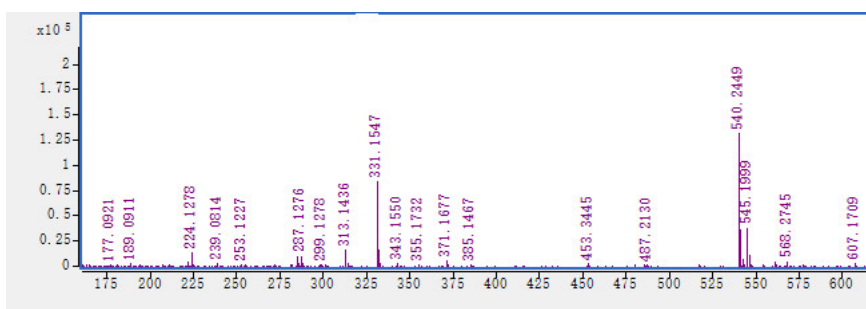

**Figure S12** MS spectrum of peak 7

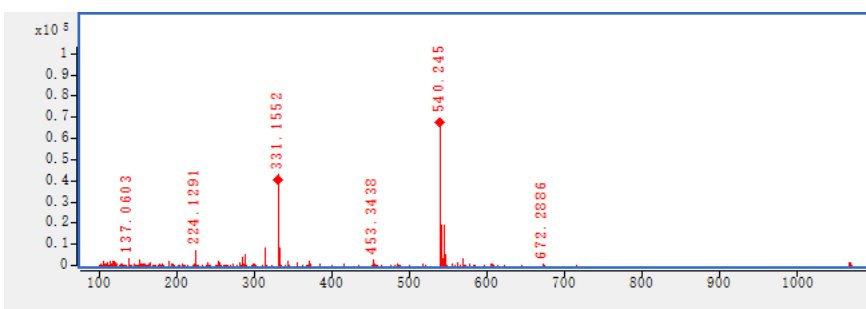

**Figure S13** MS/MS spectrum of peak 7

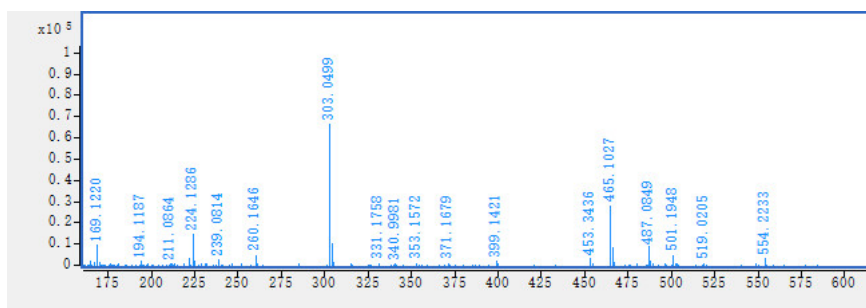

**Figure S14** MS spectrum of peak 8

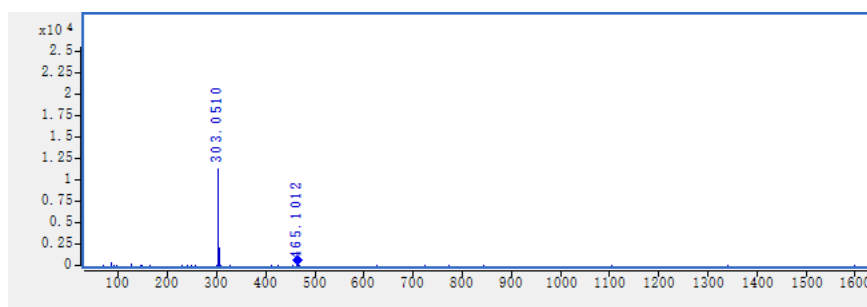

**Figure S15** MS/MS spectrum of peak 8

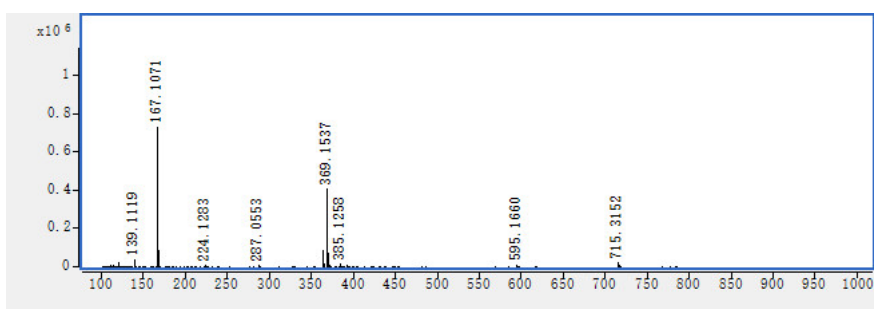

**Figure S16** MS spectrum of peak 9

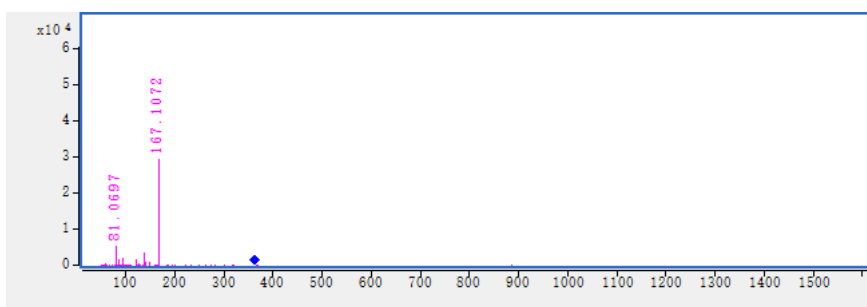

**Figure S17** MS/MS spectrum of peak 9

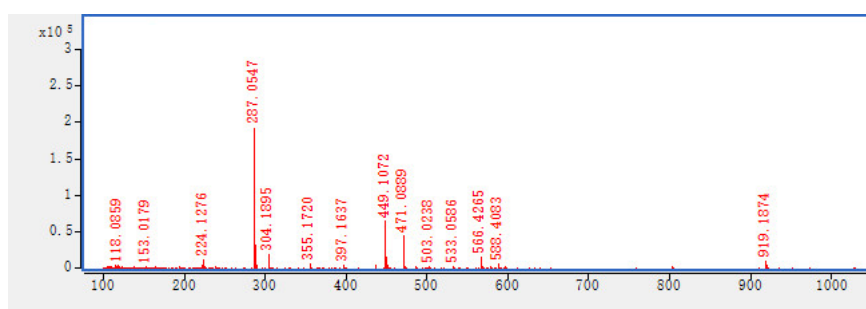

**Figure S18** MS spectrum of peak 10

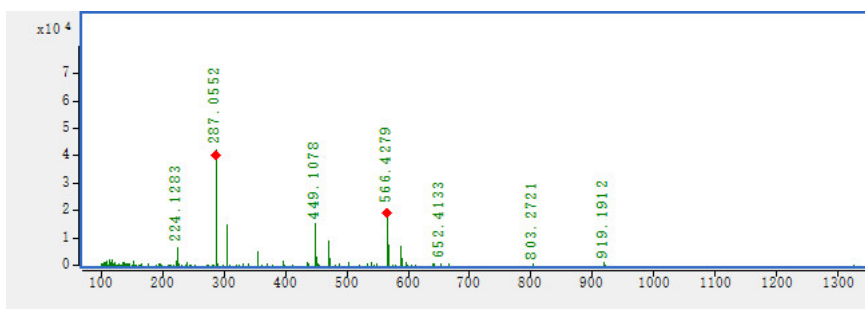

**Figure S19** MS/MS spectrum of peak 10

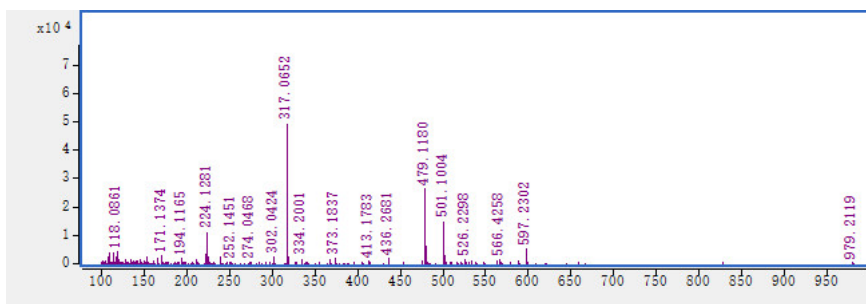

**Figure S20** MS spectrum of peak 11

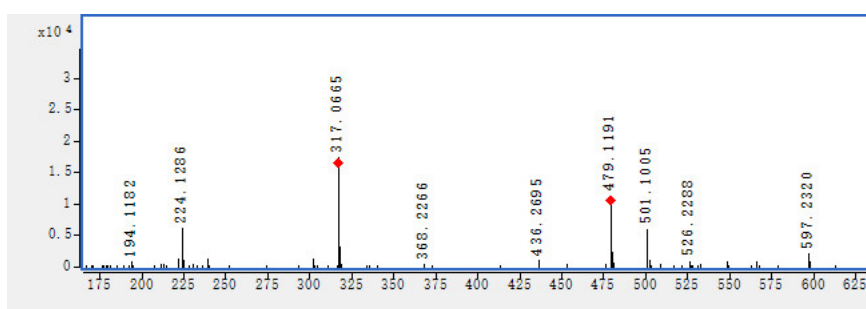

**Figure S21** MS/MS spectrum of peak 11

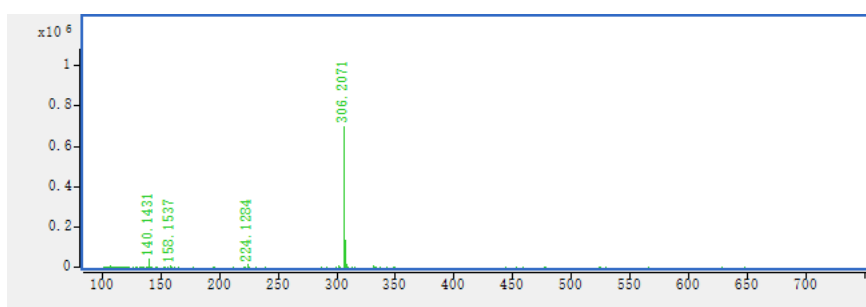

**Figure S22** MS spectrum of peak 12

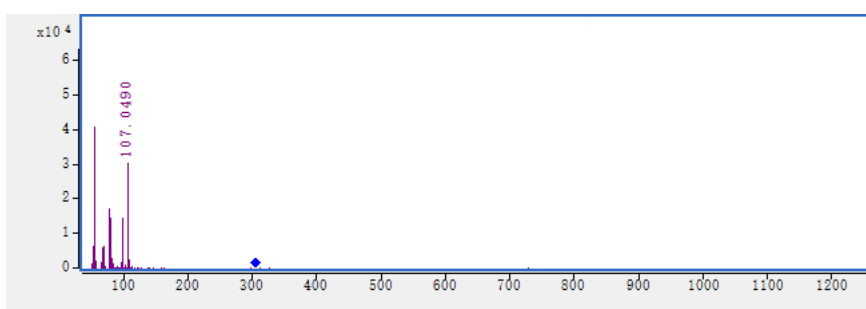

**Figure S23** MS/MS spectrum of peak 12

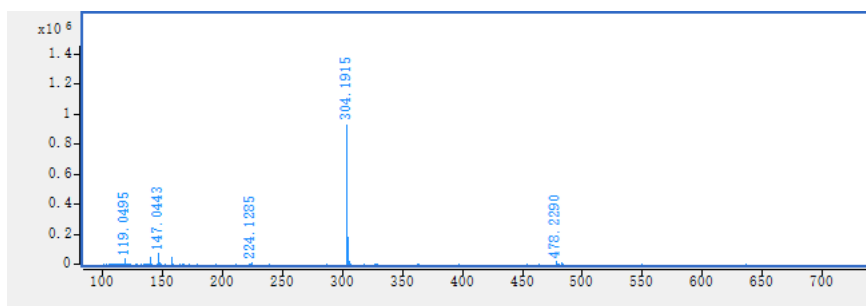

**Figure S24** MS spectrum of peak 13

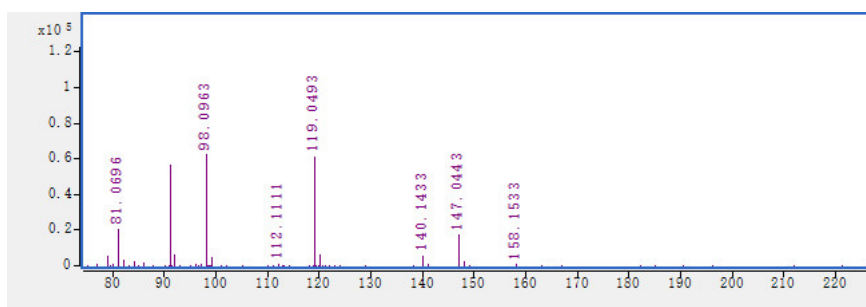

**Figure S25** MS/MS spectrum of peak 13

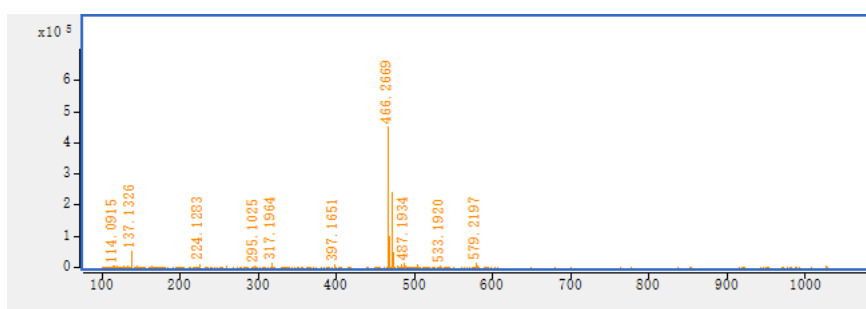

**Figure S26** MS spectrum of peak 14

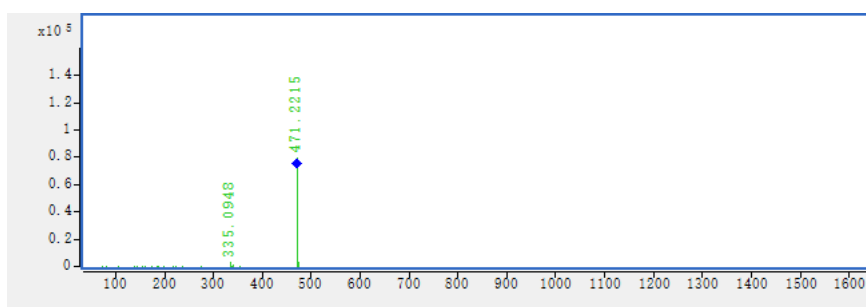

**Figure S27** MS/MS spectrum of peak 14

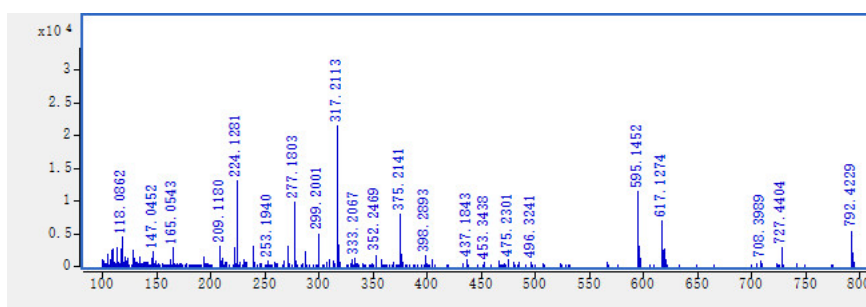

**Figure S28** MS spectrum of peak 15

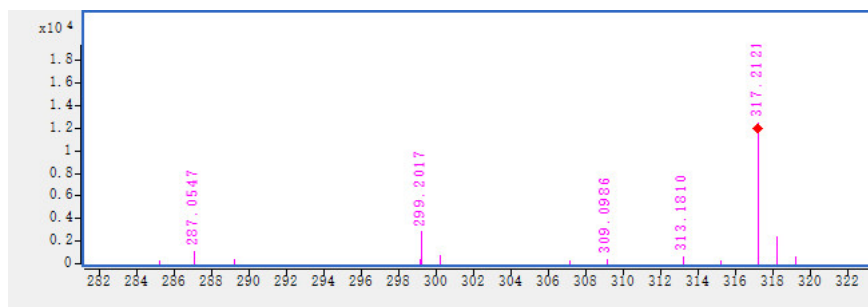

**Figure S29** MS/MS spectrum of peak 15

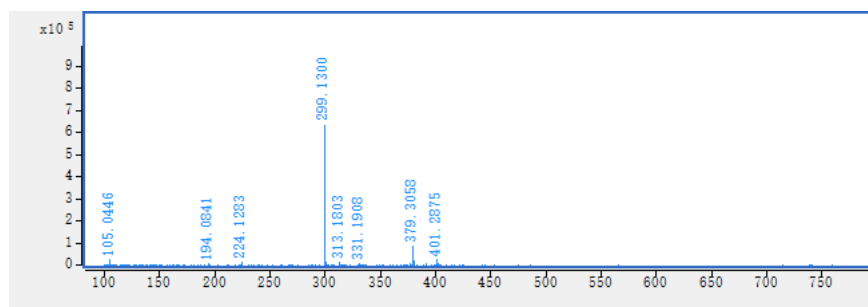

**Figure S30** MS spectrum of peak 16

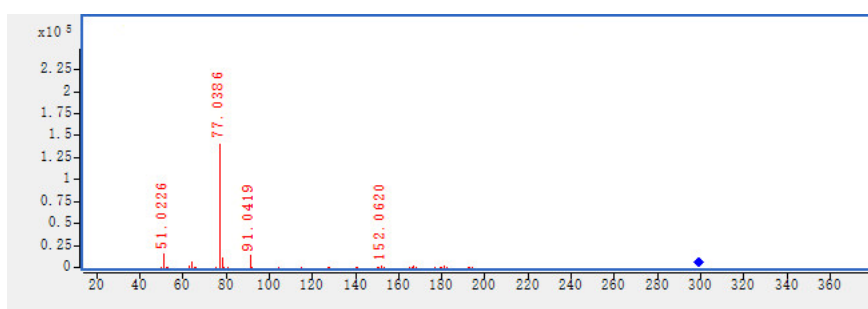

**Figure S31** MS/MS spectrum of peak 16

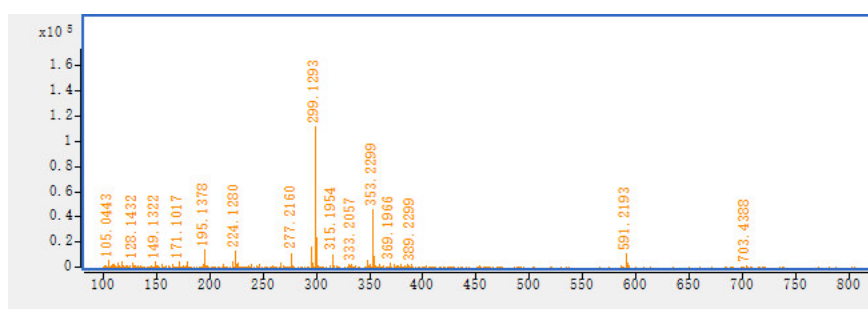

**Figure S32** MS spectrum of peak 17

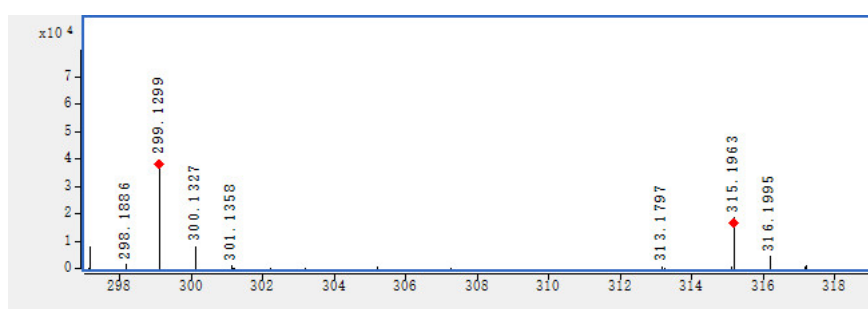

**Figure S33** MS/MS spectrum of peak 17

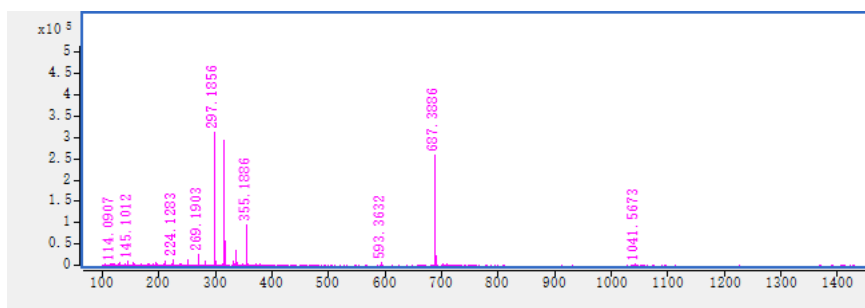

**Figure S34** MS spectrum of peak 18

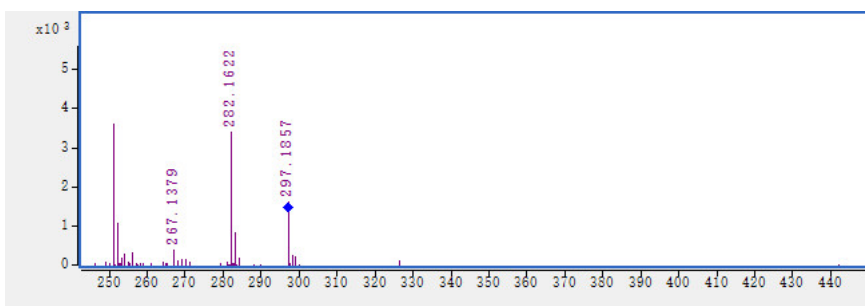

**Figure S35** MS/MS spectrum of peak 18

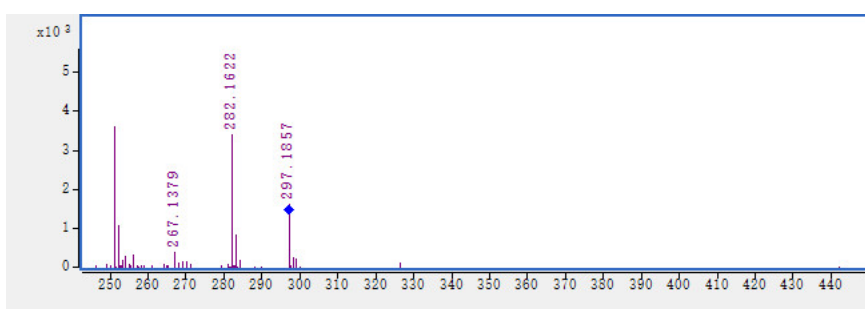

**Figure S36** MS spectrum of peak 19

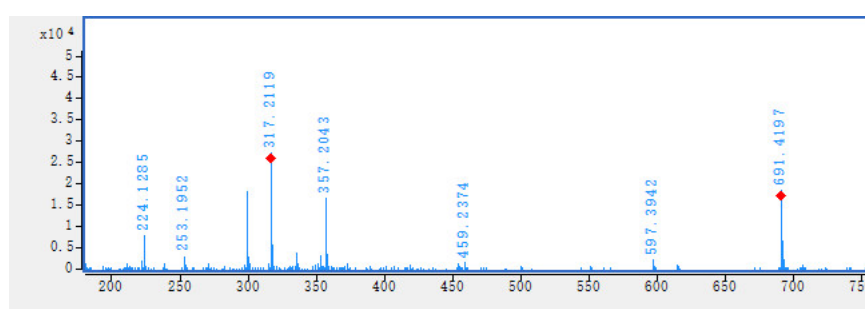

**Figure S37** MS/MS spectrum of peak 19

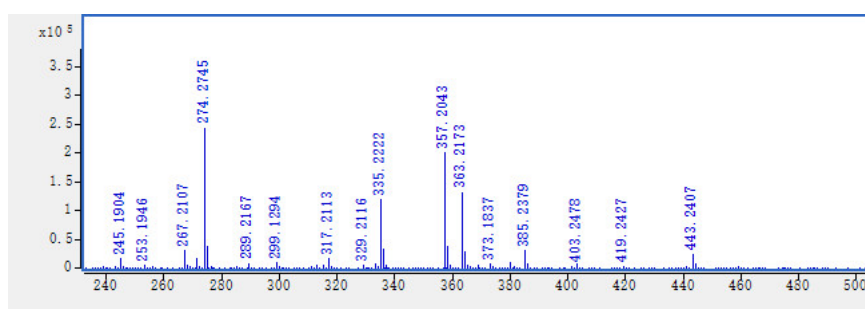

**Figure S38** MS spectrum of peak 20



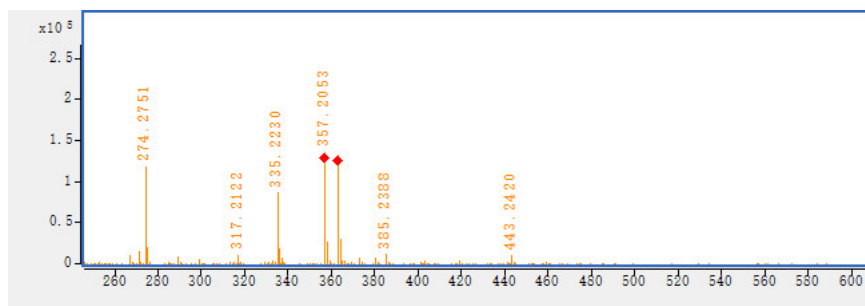

**Figure S39** MS/MS spectrum of peak 20

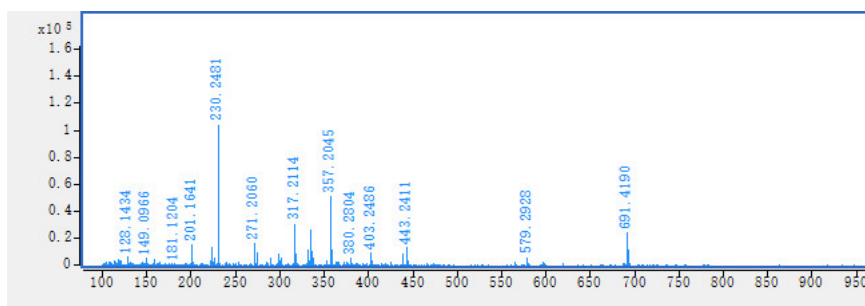

**Figure S40** MS spectrum of peak 21

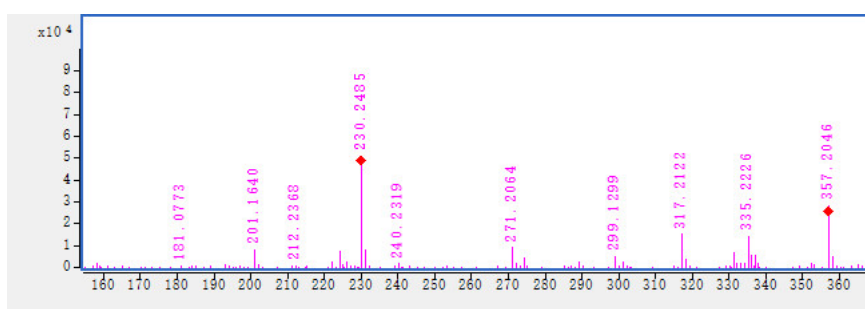

**Figure S41** MS/MS spectrum of peak 21

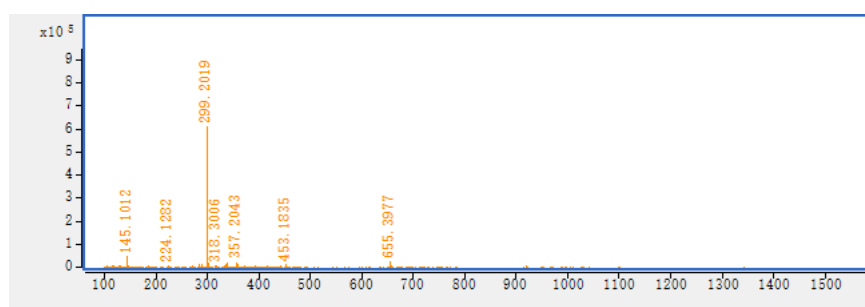

**Figure S42** MS spectrum of peak 22

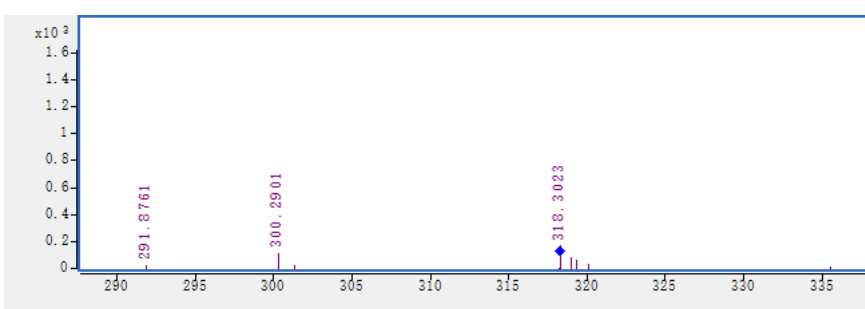

**Figure S43** MS/MS spectrum of peak 22

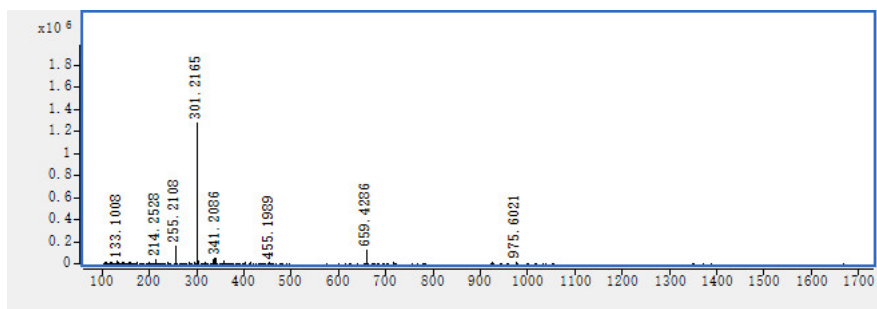

**Figure S44** MS spectrum of peak 23

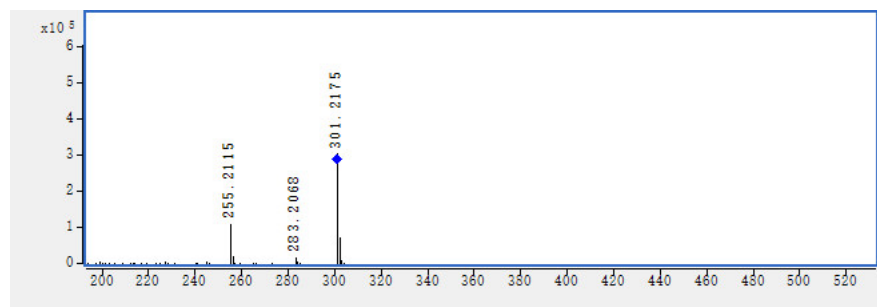

**Figure S45** MS/MS spectrum of peak 23

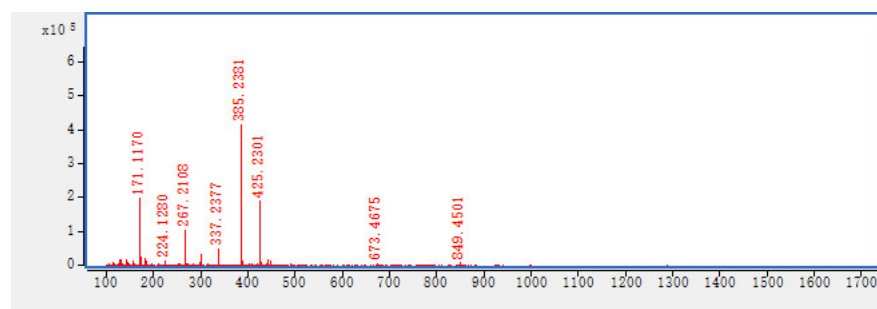

**Figure S46** MS spectrum of peak 24

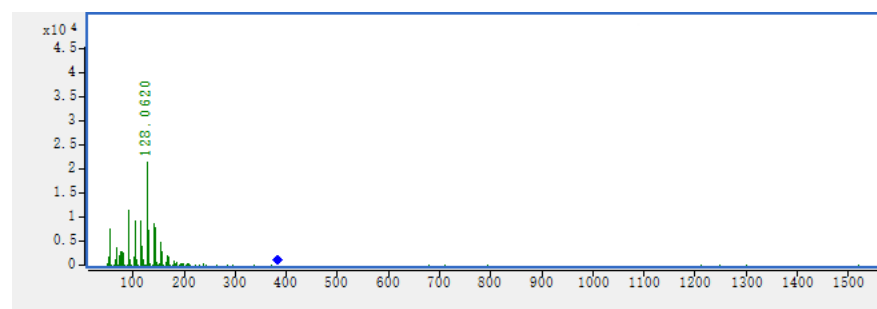

**Figure S47** MS/MS spectrum of peak 24

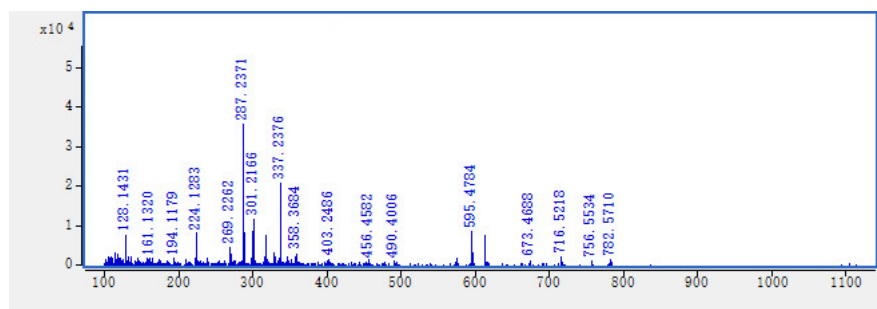

**Figure S48** MS spectrum of peak 25

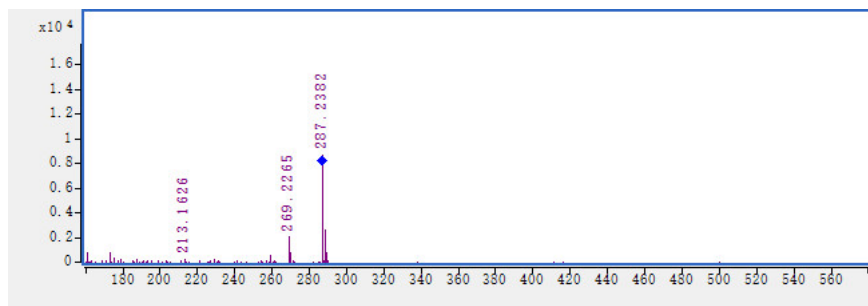

**Figure S49** MS/MS spectrum of peak 25

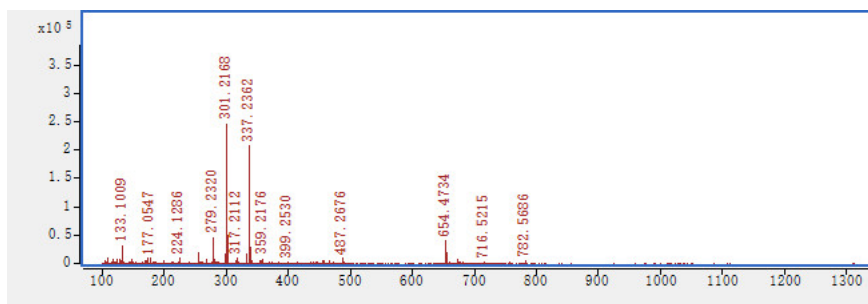

**Figure S50** MS spectrum of peak 26

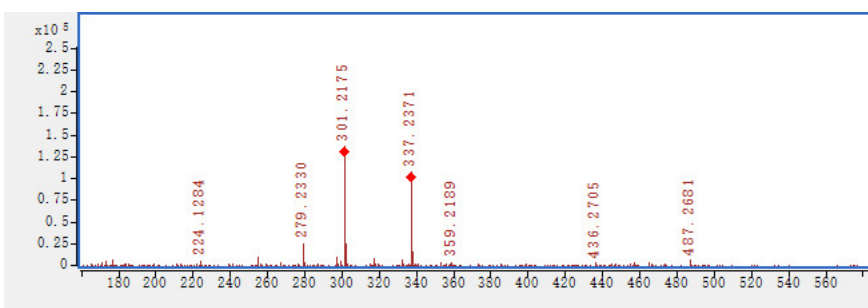

**Figure S51** MS/MS spectrum of peak 26

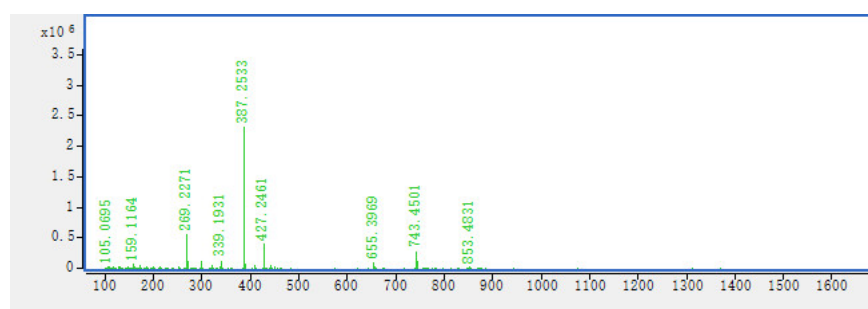

**Figure S52** MS spectrum of peak 27

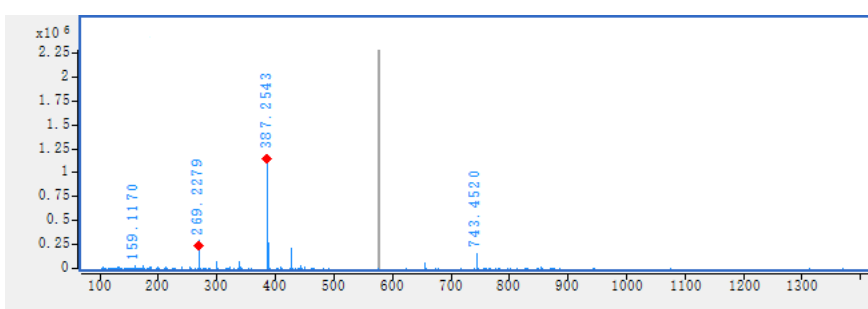

**Figure S53** MS/MS spectrum of peak 27

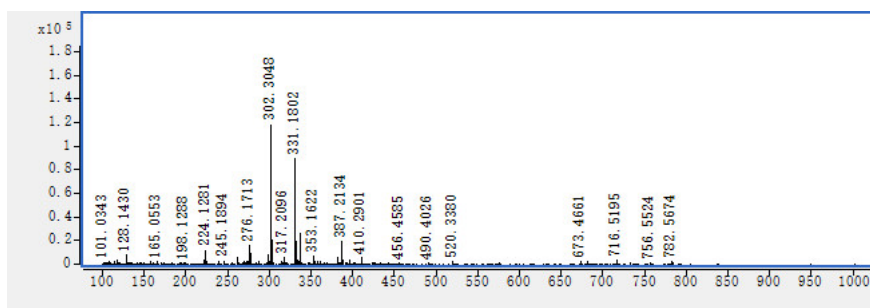

**Figure S54** MS spectrum of peak 28

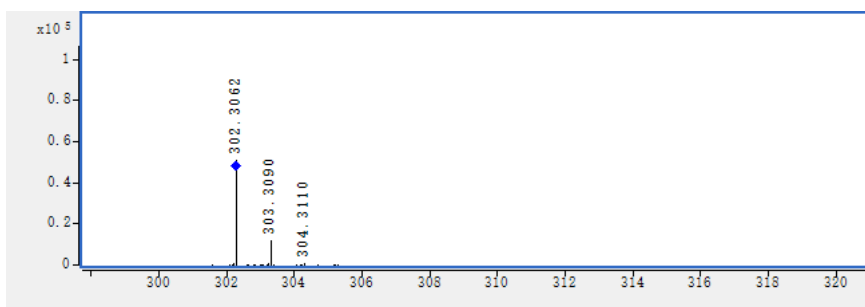

**Figure S55** MS/MS spectrum of peak 28

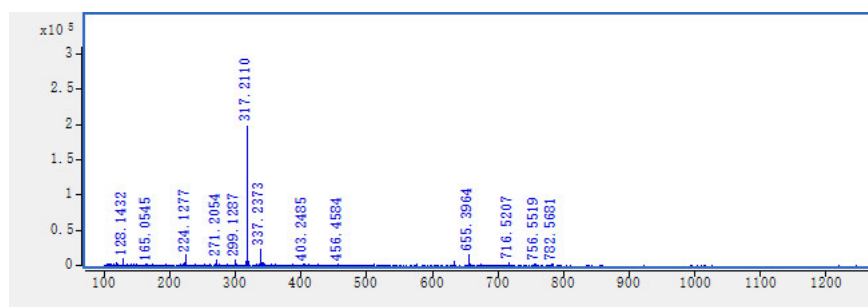

**Figure S56** MS spectrum of peak 29

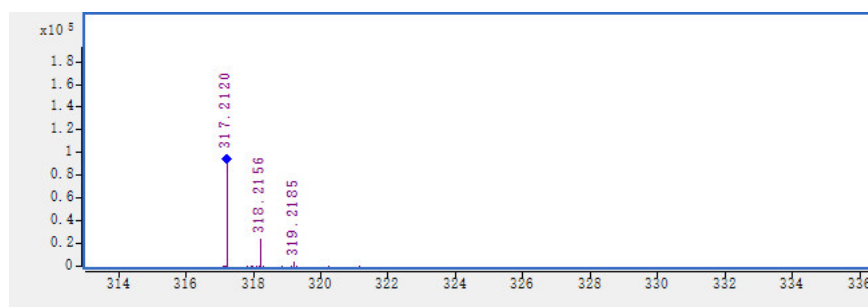

**Figure S57** MS/MS spectrum of peak 29

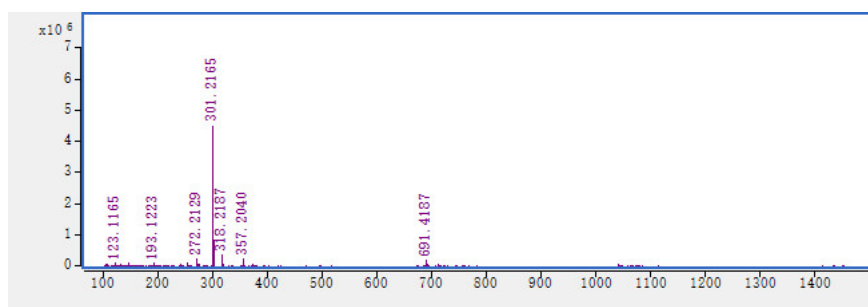

**Figure S58** MS spectrum of peak 30

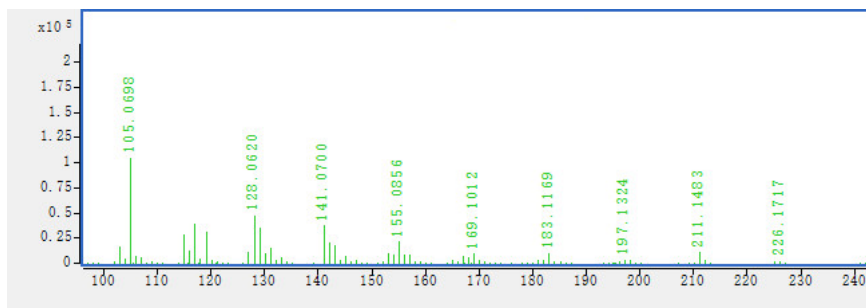

**Figure S59** MS/MS spectrum of peak 30

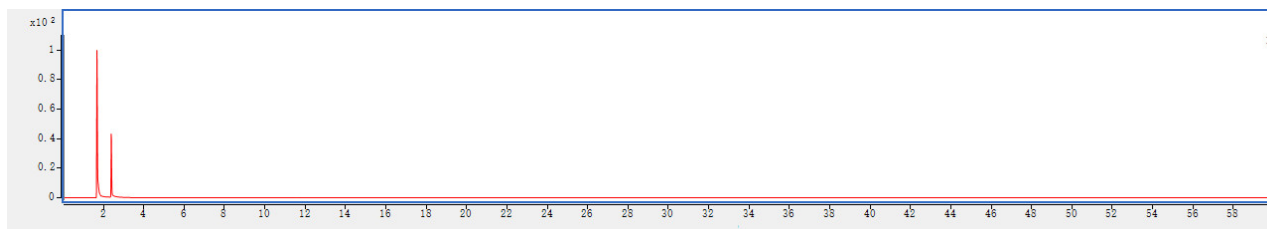

**Figure S60** UPLC-MS results captured in positive-ion mode for adenine

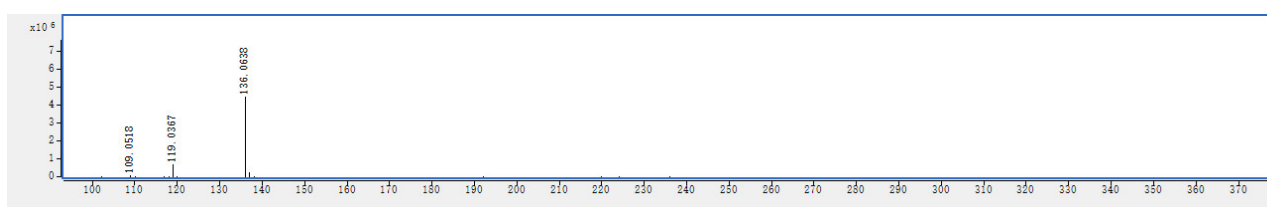

**Figure S61** MS spectrum of adenine

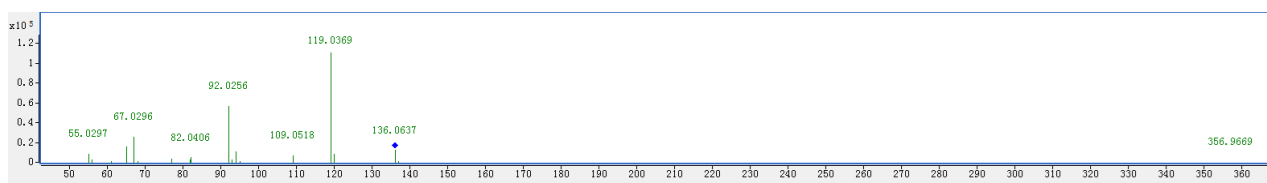

**Figure S62** MS/MS spectrum of adenine

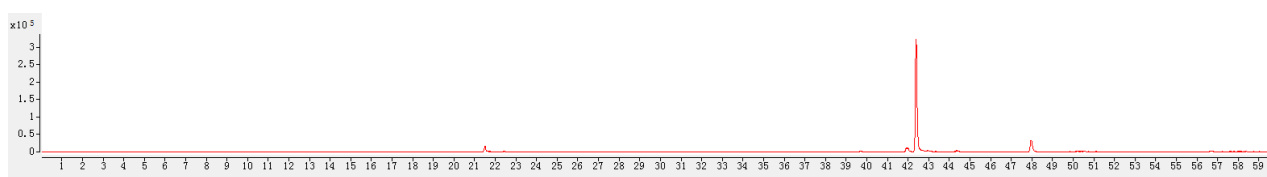

**Figure S63** UPLC-MS results captured in positive-ion mode for phytosphingosine

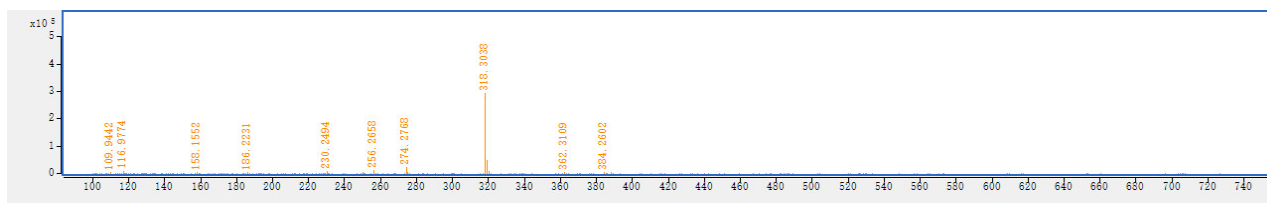

**Figure S64** MS spectrum of phytosphingosine

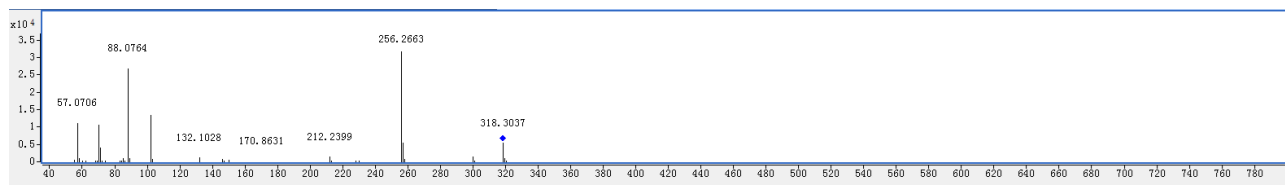

**Figure S65** MS/MS spectrum of phytosphingosine

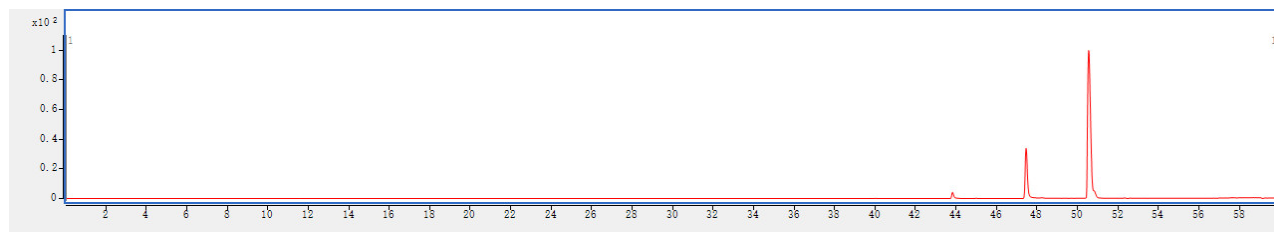

**Figure S66** UPLC-MS results captured in positive-ion mode for sphinganine

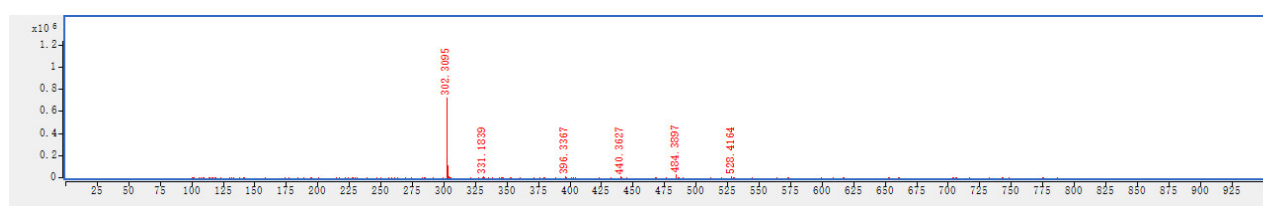

**Figure S67** MS spectrum of sphinganine

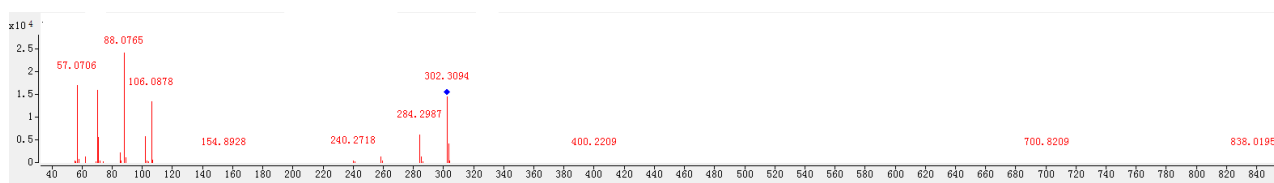

**Figure S68** MS/MS spectrum of sphinganine

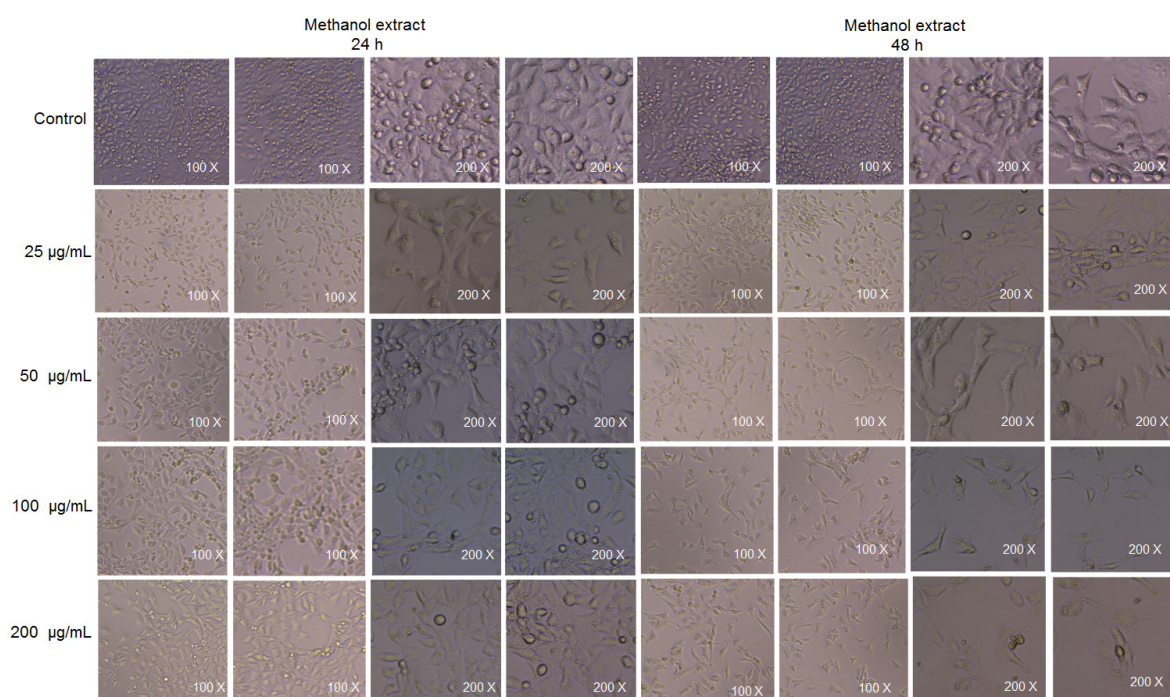

**Figure S69** Morphology of TM<sub>3</sub> mouse cells treated with methanol extract of insect gall of *Picea koraiensis* for 24 or 48 h



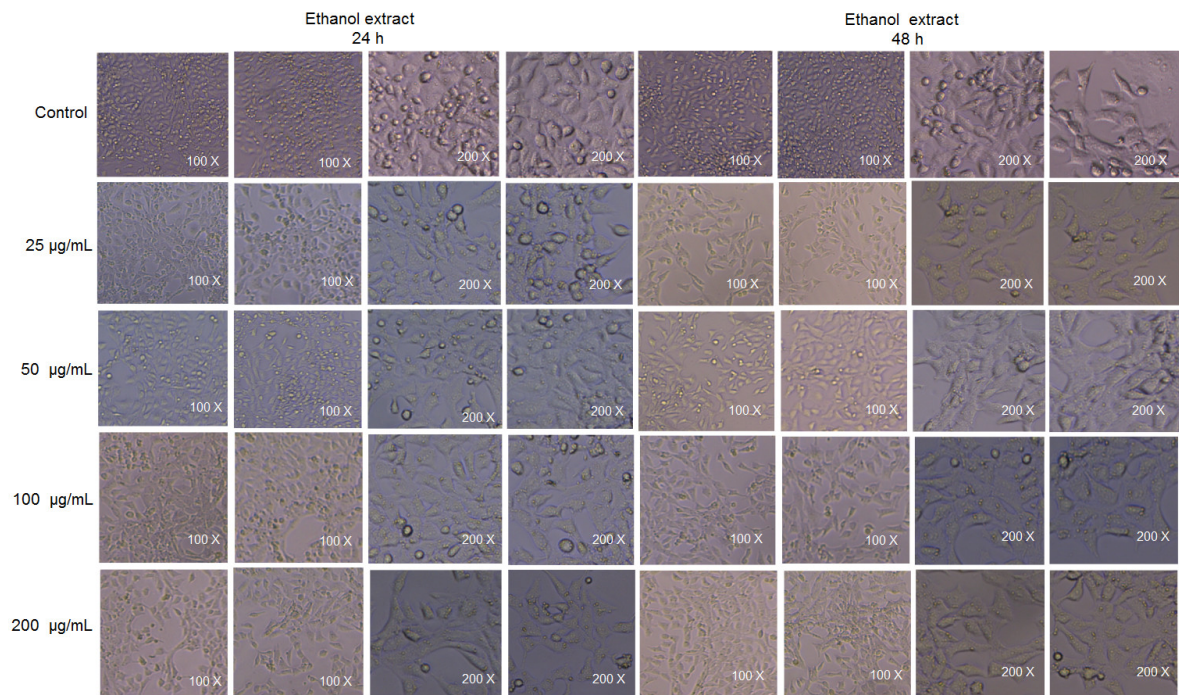

**Figure S70** Morphology of TM<sub>3</sub> mouse cells treated with ethanol extract of insect gall of *Picea koraiensis* for 24 or 48 h.
